# Supplementary material for: Encapsulation of metal cations and anions within the cavity of bis(1,4,7-triazacyclononane) receptors
Source: Royal Society of Chemistry journal article supplement (doi:10.1039/b510669a), 2005-11-22
Supplement: b510669a.pdf [file b510669a.pdf]

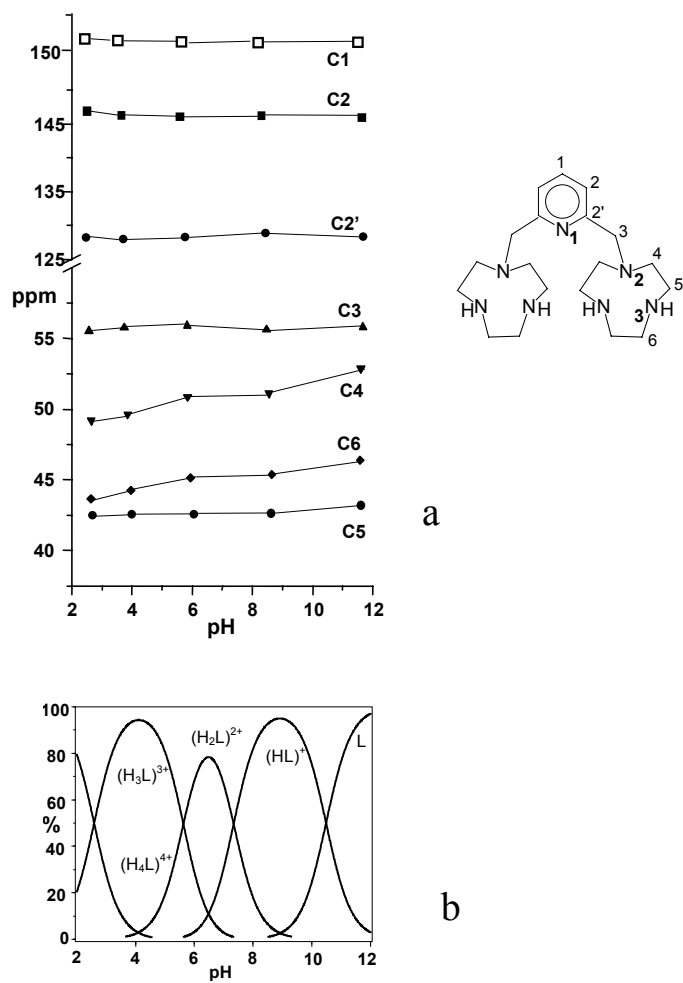

**Figure S1.** pH dependence of the  $^{13}\text{C}$  NMR signals of  $\text{L}^4$  (a) and distribution diagram of the  $\text{L}^4$  protonated species (b)

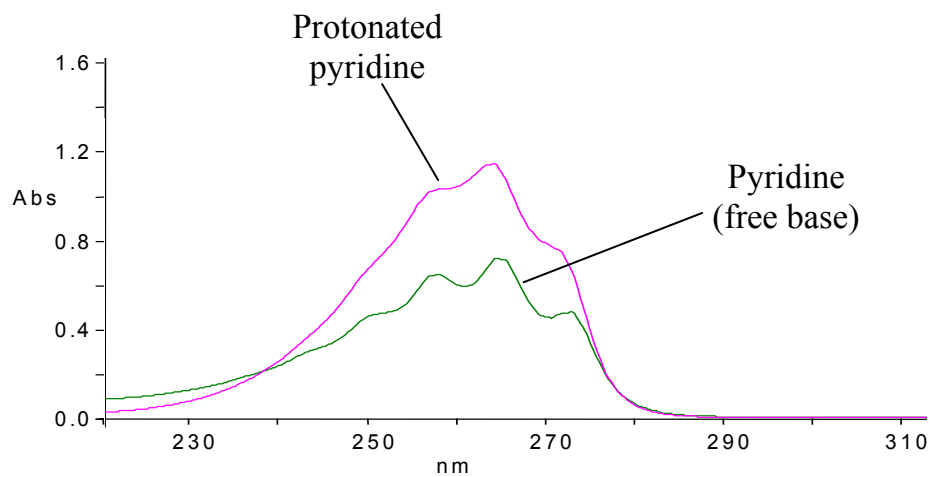

**Figure S2.** UV spectra of pyridine (free base, pH 8) and protonated pyridine (pH 3.0) ([pyridine] =  $1 \times 10^{-4}$  M)

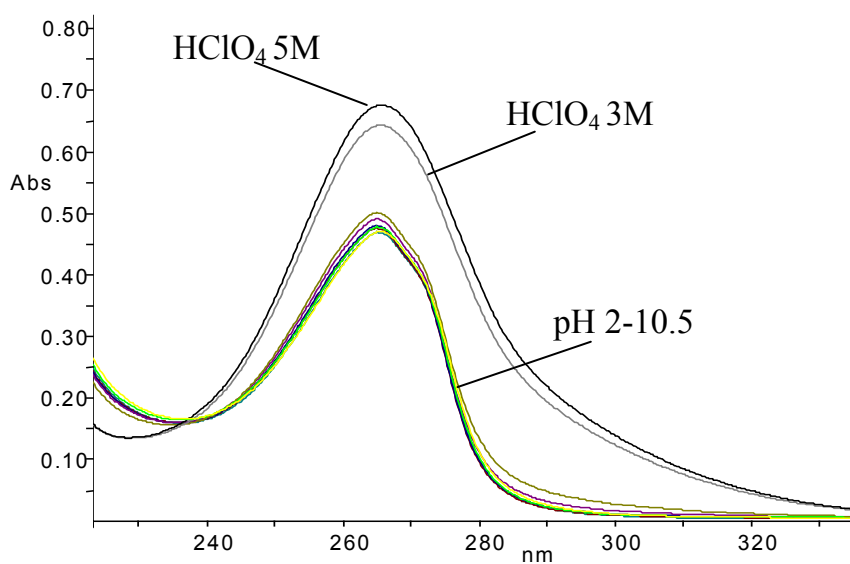

**Figure S3.** UV spectra of  $L^4$  at different pH values and in concentrated acidic media ([ $L^4$ ] =  $1.1 \times 10^{-4}$  M)
